# Supplementary material
Source: PubMed Central journal article supplement (PMC3617426)
Supplement: mmc1.pdf [file mmc1.pdf]

# The Shape of Protein Crowders is a Major Determinant of Protein Diffusion

Jessica Balbo,<sup>†</sup>△ Paolo Mereghetti,<sup>‡§||</sup>△ Dirk-Peter Herten,<sup>†</sup> and Rebecca C. Wade<sup>†¶\*</sup>

<sup>†</sup>CellNetworks Cluster and Physikalisches-Chemisches Institut, Heidelberg University, Heidelberg, Germany; <sup>‡</sup>Molecular and Cellular Modeling Group, Heidelberg Institute for Theoretical Studies, Heidelberg, Germany; <sup>§</sup>Center for Modelling and Simulation in the Biosciences and <sup>¶</sup>Zentrum für Molekulare Biologie der Universität Heidelberg, Heidelberg University, Heidelberg, Germany; and <sup>||</sup>Center for Nanotechnology Innovation, Italian Institute of Technology, Piazza San Silvestro, 12 I-56127 Pisa, Italy

**ABSTRACT** As a model for understanding how molecular crowding influences diffusion and transport of proteins in cellular environments, we combined experimental and theoretical approaches to study the diffusion of proteins in highly concentrated protein solutions. Bovine serum albumin and  $\gamma$ -Globulin were chosen as molecular crowders and as tracers. These two proteins are representatives of the main types of plasma protein and have different shapes and sizes. Solutions consisting of one or both proteins were studied. The self-diffusion coefficients of the fluorescently labeled tracer proteins were measured by means of fluorescence correlation spectroscopy at a total protein concentration of up to 400 g/L.  $\gamma$ -Globulin is found to have a stronger influence as a crowder on the tracer self-diffusion coefficient than Bovine serum albumin. Brownian dynamics simulations show that the excluded volume and the shape of the crowding protein have a significantly stronger influence on translational and rotational diffusion coefficients, as well as transient oligomerization, than hydrodynamic or direct interactions. Anomalous subdiffusion, which is not observed at the experimental fluorescence correlation spectroscopy timescales ( $>100 \mu\text{s}$ ), appears only at very short timescales ( $<1 \mu\text{s}$ ) in the simulations due to steric effects of the proteins. We envision that the combined experimental and computational approach employed here can be developed to unravel the different biophysical contributions to protein motion and interaction in cellular environments by systematically varying protein properties such as molecular weight, size, shape, and electrostatic interactions.

## INTRODUCTION

Molecular crowding is a fundamental aspect of protein diffusion and transport in cellular environments to which increasing attention is being paid (1–7). The aqueous compartments in living cells are packed with a high concentration of macromolecules such as proteins and nucleic acids, which strongly influence macromolecular diffusion (7,8). Subdiffusion, in which diffusion is hindered, and the mean-squared displacement (msd) does not increase linearly with time (9), is expected in highly crowded media such as the cytoplasm or cell membranes (6). This is because macromolecules are transiently confined to certain volumes due to molecular interactions with the surrounding crowders before they are, stochastically, allowed to diffuse further. Subdiffusion has been proposed to influence how proteins find partners for specific interactions in crowded environments (10).

To mimic physiological media in *in vitro* experiments, a total concentration of macromolecules of up to 400 g/L is commonly used (7,11). Frequently, random-coil polymers, such as polyethylene glycol, Ficoll, or dextran, are used as macromolecular crowding agents because of their ease of availability and experimental manipulation (12,13). However, these nonbiological crowding agents may not reveal physiologically relevant information (2,3).

To obtain a more realistic description of physiological environments, biological macromolecules, such as globular proteins, can be used as crowding agents (3).

In this work, we have studied the effects of crowder and tracer size, shape, direct interactions, and hydrodynamic interactions on the translational diffusion coefficients of bovine serum albumin (BSA) and  $\gamma$ -Globulin (IgG) by means of fluorescence correlation spectroscopy (FCS) and Brownian dynamics (BD) simulation. BSA and IgG were used as tracers as well as crowding agents. The crystal structures of human and bovine serum albumin have a heart-shaped structure (14), whereas antibodies like IgG form a Y-shape. IgG has a much higher molecular mass (155 kDa) than BSA (66 kDa).

FCS is a highly sensitive optical method to measure the diffusion of fluorescently labeled molecules and their interactions in solution (15–19). FCS can be used to analyze fluorescence-intensity fluctuations arising from local concentration fluctuations of a low concentration solution (1 nM) of fluorescently labeled molecules. Because the measured correlation function reflects the kinetics of molecules diffusing in and out of the detection volume of a confocal microscope, it is an ideal analytical tool for studying molecular dynamics (20,21), concentration (15), chemical reaction kinetics (22), and the interactions of molecules at nanomolar concentrations (15,23–25). In the last decade, FCS has become a standard technique for studying diffusion, including anomalous diffusion and biomolecular interactions in crowded environments (12,26–29).

Submitted October 9, 2012, and accepted for publication February 19, 2013.

△Jessica Balbo and Paolo Mereghetti contributed equally to this work.

\*Correspondence: rebecca.wade@h-its.org

Editor: Bert de Groot.

© 2013 by the Biophysical Society  
0006-3495/13/04/1576/9 \$2.00

<http://dx.doi.org/10.1016/j.bpj.2013.02.041>

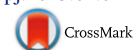

BD simulation is a computational technique that can be used to study the diffusion of macromolecules in solution on timescales from nanoseconds to hundreds of microseconds (30–32). In BD simulations, solvent molecules are treated implicitly. The inertia of the solute molecules is neglected under the assumption that the velocities of the diffusing solute particles relax much faster than the time interval used for the simulation analysis (33). In the model used here, the proteins are treated as atomically detailed rigid bodies moving in a continuum solvent.

## MATERIAL AND METHODS

### Sample preparation

Albumin from bovine serum (BSA),  $\gamma$ -Globulin (IgG) from bovine blood, and phosphate-buffered saline (PBS) were purchased from Sigma, Munich, Germany.  $\gamma$ -Globulin is referred to as IgG, because it is the main fraction (80%).

For titration experiments, the proteins were used without further purification and were dissolved in PBS to a wide range of concentrations (up to 400 g/L). The titration studies were performed with a small number of labeled proteins (tracer,  $\ll 0.001$  g/L) in a solution of unlabeled proteins (crowder, up to 400 g/L). For 0 g/L, the tracer proteins were dissolved in PBS. The final concentration of protein in 0g/L protein solution was  $< 40$   $\mu$ g/L. Labeled proteins (BSA-633 and IgG-633) were prepared through covalent coupling of lysine residues with the amino-reactive *n*-hydroxysuccinimidyl ester derivative of the fluorescent dye Atto633 (see the [Supporting Material](#)).

### Fluorescence correlation spectroscopy

The autocorrelation function describes the self-similarity of a measured signal within a certain time interval. The fluorescence fluctuation at time  $t$  is  $\delta F(t) = F(t) - \langle F(t) \rangle$  and gives the deviation from the average fluorescence intensity (34). To analyze the fluorescence fluctuations  $\delta F(t)$ , a normalized form of the autocorrelation function was used (22). The fluctuations of the fluorescence signal at time  $t$  were multiplied with the fluctuations of the signal shifted by a lag time  $\tau$ . The correlation function  $G(\tau)$  of the temporally changed fluorescence signal  $F(t)$  for a single species is defined as

$$G(\tau) = \frac{\langle \delta F(t) \delta F(t + \tau) \rangle}{\langle F(t) \rangle^2}. \quad (1)$$

The measured fluorescence autocorrelation functions  $G(\tau)$  were fitted using the nonlinear least-squares method with a fitting program (OriginLab, Northampton, MA). The autocorrelation function  $G(\tau)$  for a free three-dimensional diffusion single species with triplet state correction is given as (35)

$$G(\tau) = X_{\text{Triplet}}(\tau) G_D(\tau), \quad (2)$$

with triplet state correction

$$X_{\text{Triplet}} = \left[ 1 - T + T e^{-\left(\frac{\tau}{\tau_t}\right)} \right], \quad (3)$$

and the translation diffusion-dependent term

$$G_D(\tau) = \frac{1}{N} \left( \frac{1}{1 + \left(\frac{\tau}{\tau_D}\right)} \frac{1}{\sqrt{1 + \left[\frac{\tau}{\left(\frac{z_0}{w_0}\right)^2 \tau_D}\right]}} \right). \quad (4)$$

In this equation,  $N$  is the total number of fluorescent particles in the detection volume element, which corresponds to  $1/[G(0)-1]$ . The values  $z_0$  and  $w_0$  represent the radii of the axial and radial axis of the detection volume element.

$$\tau_D = \frac{w_0^2}{4D'}$$

is defined as the average lateral diffusion time, where  $D'$  is the translational self-diffusion coefficient. The values  $T$  and  $\tau_t$  are the fractional population and the relaxation time of the triplet state, respectively. The elongation and size of the volume were obtained by using the equation above. The calibration was done by measuring the diffusion time of Atto655-carboxylic acid in pure buffer and taking into account its translational diffusion coefficient (36).

### Brownian dynamics simulations

BD simulations were performed with SDAMM (31), a parallelized program based on the SDA software (37) capable of handling many proteins treated as rigid bodies in atomic detail. The positions and orientations of the proteins were propagated using the Ermak-McCammon algorithm (33).

BD simulations were carried out using 250 protein molecules initially randomly positioned (avoiding overlaps) in a rectangular box with periodic boundary conditions. By using 250 proteins, each protein was surrounded by at least two nonperiodic proteins in each direction. The dimensions of the box were varied according to the concentration of the protein solution. Homogeneous solutions of BSA or IgG were simulated.

Each system was subjected to 6  $\mu$ s of simulation at 300 K. Equilibration was assessed by monitoring the convergence of the radial distribution function and the stabilization of the energies. In all cases, 1  $\mu$ s was sufficient to obtain an equilibrated system according to these criteria and the remaining 5  $\mu$ s were used for the analysis. The integration timestep was 0.5 ps. The positions and orientations of the proteins were recorded along with energy values every 0.5 ns. Forces were computed as described below.

### Interaction energies and forces

The forces between the proteins were computed as finite-difference derivatives of the pairwise free energies of interaction between the proteins. For each pair of proteins, the interaction free energy,  $\Delta G^{1-2}$ , was defined as

$$\begin{aligned} \Delta G^{1-2} = & \frac{1}{2} \sum_{i_2} \Phi_{\text{el}_1}(\mathbf{r}_{i_2}) \cdot q_{i_2} + \frac{1}{2} \sum_{j_1} \Phi_{\text{el}_2}(\mathbf{r}_{j_1}) \cdot q_{j_1} \\ & + \sum_{i_2} \Phi_{\text{edes}_1}(\mathbf{r}_{i_2}) \cdot q_{i_2}^2 + \sum_{j_1} \Phi_{\text{edes}_2}(\mathbf{r}_{j_1}) \cdot q_{j_1}^2 \\ & + \sum_{m_2} \Phi_{\text{npdes}_1}(\mathbf{r}_{m_2}) \cdot A_{m_2} + \sum_{n_1} \Phi_{\text{npdes}_2}(\mathbf{r}_{n_1}) \cdot A_{n_1} \\ & + \sum_{m_2} E_{\text{softcore}_1}(\mathbf{r}_{m_2}) + \sum_{n_1} E_{\text{softcore}_2}(\mathbf{r}_{n_1}). \end{aligned} \quad (5)$$

A detailed description and parameterization of Eq. 5 can be found in Merghetti et al. (31) and Gabdoulline and Wade (38). In Eq. 5,  $\Phi_{\text{el}}$  is

the electrostatic potential computed by solution of the linearized Poisson-Boltzmann equation,  $\Phi_{\text{edes}}$  is the electrostatic desolvation potential,  $\Phi_{\text{npdes}}$  is the nonpolar desolvation potential, and  $E_{\text{softcore}}$  is the soft-core repulsion energies. The effective charges,  $q$ , are located on selected atoms in charged residues and derived from computation of the electrostatic potential with partial atomic charges assigned to all atoms (39),  $A$  are solvent-accessible surface areas, and the  $\mathbf{r}$  notations are atomic coordinates. For computational efficiency, all interaction potentials,  $\Phi$ , were mapped onto grids centered on the simulated proteins.

## Hydrodynamic interactions

Hydrodynamic interactions (HI) are implemented in SDAMM using a mean field method (32,40–42). In this method, an isotropic short-time translational diffusion coefficient ( $D^{\text{short}}$ ) for a protein of a given type is assigned and rescaled based on the local volume fraction ( $\phi$ ) occupied by the proteins according to  $D^{\text{short}}(\phi)/D_0^{\text{short}} = f(\phi)$ . The function  $f(\phi)$ , which describes the volume fraction-dependent, short-time translational diffusion coefficient, normalized by its infinite dilution value ( $D_0^{\text{short}}$ ), is computed according to the model developed by Tokuyama and Oppenheim (43) which includes near-field as well as far-field hydrodynamic interactions (see Section S3 in the Supporting Material). Similarly, we took into account rotational HI by rescaling the short-time rotational diffusion coefficient using the model derived by Cichocki et al. (44), which includes lubrication forces as well as two- and three-body expansions of the mobility functions:

$$\frac{D^{\text{short}}(\phi)}{D_0^{\text{short}}} = 1 - 0.631\phi - 0.726\phi^2. \quad (6)$$

The rescaled values are then used in the Brownian dynamics simulations for updating the particle positions.

## Protein preparation

Simulations of bovine serum albumin (BSA) solutions were performed using a three-dimensional structure of BSA obtained by homology modeling based on the crystal structure of human serum albumin (HSA) (14). The model was taken from MODBASE (45). Because of the high sequence identity (76%) between BSA and HSA, this model showed good quality as assessed using PROCHECK (46), ProQ (47), and AIDE (48). Further details about the model can be found in the Supporting Material. For the  $\gamma$ -Globulin simulations, we decided to consider only IgG as it represents the main fraction of the  $\gamma$ -Globulin in bovine blood (fraction 80%). Because the three-dimensional structure of bovine IgG is not available, we used the crystal structure of an intact mouse IgG (PDB:1IGT (49)) which has the highest resolution among the available intact IgG crystal structures.

Polar hydrogen atoms were added according to the specified pH and ionic strength using H++ (50). All simulations were performed at pH = 7 and ionic strength = 150 mM. At these conditions, the net charges of BSA and IgG are  $-16e$  and  $+3e$ , respectively. Partial atomic charges and radii were assigned to all atoms from the OPLS force field (51). Electrostatic potential grids  $\Phi$  were computed by solving the linearized Poisson-Boltzmann equation using the UHBD software (52).

For BSA, nonpolar desolvation, electrostatic desolvation, and soft-core repulsion grids were set to  $200 \times 200 \times 200 \text{ \AA}^3$  with a grid spacing of  $1.0 \text{ \AA}$ , whereas the electrostatic potential grid size was set to  $130 \times 130 \times 130 \text{ \AA}^3$  with a grid spacing of  $1.0 \text{ \AA}$ . For the IgG, nonpolar desolvation, electrostatic desolvation, and soft-core repulsion grids were set to  $190 \times 190 \times 190 \text{ \AA}^3$  with a grid spacing of  $1.0 \text{ \AA}$ , whereas the electrostatic potential grid size was set to  $200 \times 200 \times 200 \text{ \AA}^3$  with a grid spacing of  $1.0 \text{ \AA}$ .

The infinite dilution values of the translational and rotational diffusion coefficients were computed using HYDROPRO from the protein atomic coordinates (53).

## ANALYSIS

### Translational self-diffusion coefficient

The time-dependent, time ensemble-averaged, mean-squared translational displacement ( $\langle msd(\tau) \rangle_{te}$ ) was computed using

$$\langle msd(\tau) \rangle_{te} = \frac{1}{N'} \sum_{i=1}^{N'} \frac{1}{(t^{\text{end}} - \tau)/\tau + 1} \times \sum_{t=0}^{(t^{\text{end}} - \tau)/\tau} [\mathbf{r}_i(t + \tau) - \mathbf{r}_i(t)]^2, \quad (7)$$

where  $N'$  is the number of proteins of the same type present in the simulation,  $\tau$  is the time interval,  $t^{\text{end}}$  is an integer multiple of  $\tau$ , and  $\mathbf{r}_i(t)$  is the center of geometry of protein  $i$  at time  $t$ . In this article,  $\langle msd(\tau) \rangle_{te}$  will be simply denoted by  $msd$ .

A linear fit was performed on a closed interval  $[\tau_1, \tau_2]$ , and the self-diffusion coefficient,  $D'$ , was computed from the slope using the Einstein relation (see the Supporting Material). The results were compared with an analytical model developed by Tokuyama and Oppenheim (43) (see the Supporting Material) which describes the concentration dependence of the normalized long-time translational self-diffusion coefficient.

### Computation of the anomalous exponent for translational diffusion

In complex media, the mean-square displacement of the protein position may deviate from the linear Stokes-Einstein relation, and obey a more general power-law behavior characterized by the exponent  $\alpha$  (10). If  $\alpha < 1$ , the dynamics is subdiffusive. On the other hand, when  $\alpha > 1$  the dynamics is superdiffusive. The exponent  $\alpha$  was computed by a least-square fit of the curve  $\log(msd/\tau)$  versus  $\log(\tau)$ . For details of the computation of the  $\alpha$ -exponent, see the Supporting Material.

### Rotational diffusion coefficient

The rotational diffusion coefficient was obtained by first computing the time-ensemble averaged autocorrelation function of the protein orientation vectors  $\mathbf{e}(t)$  and then fitting it with a single exponential of the form  $\langle \mathbf{e}(t)\mathbf{e}(t + \tau) \rangle \propto A e^{-t/\tau_{\text{rot}}}$  (see the Supporting Material). Alternatively, as described in Mazza et al. (54), the long-time rotational diffusion coefficient was computed from the ensemble-averaged rotational mean-squared displacement (see the Supporting Material).

### Oligomer analysis

The average fractions of oligomeric species were computed by recording the occurrence of the oligomeric states at each step of the simulation and then averaging over the total number of steps. The criteria used to define an oligomer and the details of the computation can be found in the Supporting Material.

## RESULTS AND DISCUSSION

### Translational self-diffusion coefficient

The translational self-diffusion coefficients ( $D^t$ ) of IgG and BSA were determined from FCS measurements and computed from BD simulations at several protein concentrations.

To exemplify the results of the FCS measurements, Fig. 1 (*left panel*) shows three measured normalized autocorrelation curves of BSA-633 in 0 g/L, 150 g/L, and 300 g/L BSA solution. The short-time fluctuations in the curve with 300 g/L BSA are within the standard deviation of the 10 repetitions. Moreover, the systematic measurement error, the optical aberration due to refractive index variation, is within the accuracy of the standard FCS technique (55). The diffusion coefficients determined from the FCS measurements are shown in Fig. 1. The normalized translational diffusion coefficients  $D^t/D_0^t$  of the tracer proteins, BSA-633 (*solid symbols*) and IgG-633 (*open symbols*), are plotted as a function of protein volume fraction. Plots are for crowder solutions of BSA with a maximum concentration of 400 g/L (*black symbols*) and IgG with a maximum concentration of 200 g/L (*gray symbols*). The tracer mobility was reduced by increasing the crowder concentration, resulting in a corresponding decrease in the transla-

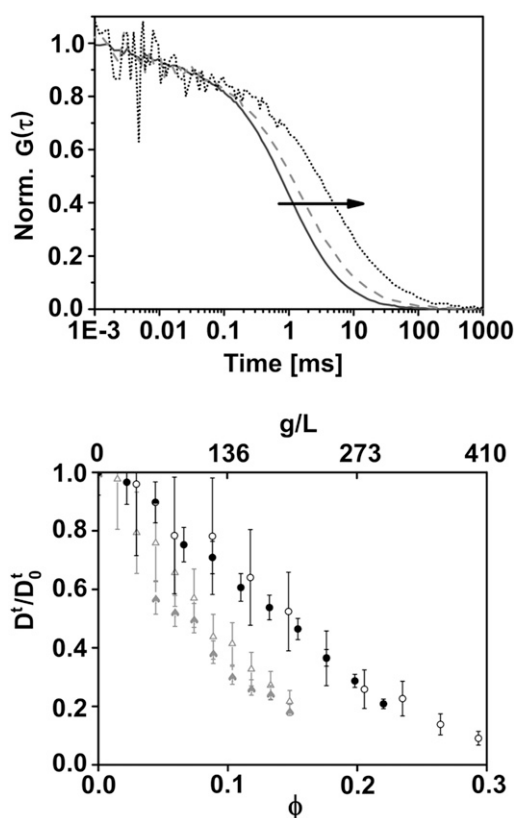

FIGURE 1 (*Top*) Exemplary normalized FCS curves. Each curve is an average of ten 60-s acquisitions of BSA-633 in BSA solution with increasing protein concentration shown without error bars for clarity. The average diffusion time increased with the BSA concentration: 0 g/L (*solid line*), 150 g/L (*shaded dashed line*), and 300 g/L (*dotted line*). (*Bottom*) Normalized translational diffusion coefficients of labeled BSA and IgG in the corresponding protein solutions measured with FCS by titration of BSA-633 (*solid symbols*) and IgG-633 (*open symbols*) in up to 400 g/L BSA solution (*solid symbols*) and up to 200 g/L IgG solution (*shaded symbols*).

tional diffusion coefficient. A distinctly faster decay was visible for the IgG crowder solution than for BSA solution.

Because the dependence on crowder type appears more important than the dependence on the tracer type, simulations were performed using homogeneous protein solutions, i.e., BSA in BSA and IgG in IgG. In Fig. 2, experimental and computed values of the concentration-dependent translational diffusion coefficients are compared to an analytical model derived by Tokuyama et al. (56) which considers spherical particles interacting by a soft-core potential as well as many body near-field and far-field hydrodynamic interactions. The comparison with the long-time self-diffusion coefficient obtained using the Tokuyama analytical model helps to explain what causes the reduction of the diffusion coefficient.

For BSA (Fig. 2 A), two sets of experimental data are shown, one obtained in this work using FCS (*red crosses*), the other (*orange circles*) obtained by pulsed-gradient spin-echo NMR by Nesmelova et al. (57). General agreement between the two experimental measurements is evident although a deviation appears at intermediate

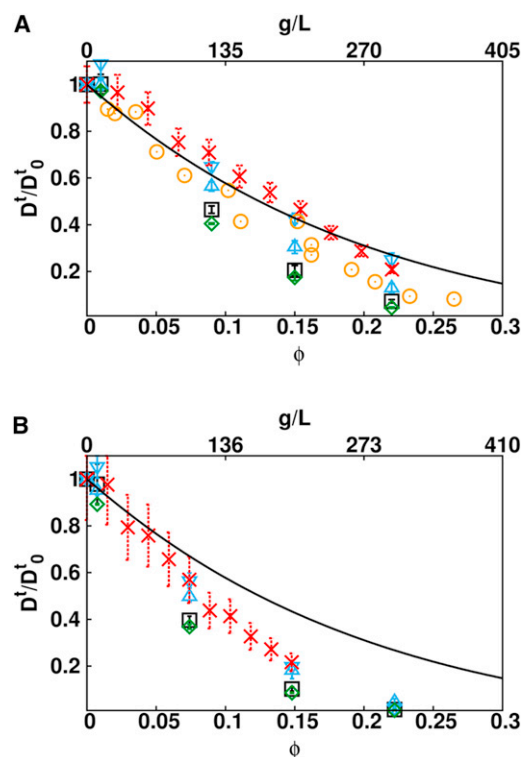

FIGURE 2 Normalized long-time translational self-diffusion coefficient of BSA (A) and IgG (B). Experimental values obtained in this work using FCS (*red crosses*) and, for BSA, by pulsed-gradient spin-echo NMR by Nesmelova et al. (57) (*orange circles*) are shown. The values computed from BD simulations with direct interactions and t-HI and r-HI (*green diamonds*), with direct interactions and t-HI (*black squares*), with soft-core and t-HI (*blue up-triangles*), and with soft-core interactions only (*blue down-triangles*) are shown. (*Black continuous lines*) Diffusion coefficient computed from the analytical model of Tokuyama et al. (56).

concentrations ( $0.1-0.15 \phi$ ). In BD simulations, the role of the different interaction terms can be revealed by including or omitting such terms in the simulations. We performed four sets of simulations: one including direct interactions, defined by Eq. 5, plus translational (t-HI) and rotational (r-HI) hydrodynamic interactions (the abbreviation HI means t-HI plus r-HI); a second set including direct and t-HI; a third set including soft-core interactions and t-HI; and finally, a set performed with the soft-core energy term only. As expected, on both BSA and IgG, rotational hydrodynamics have a negligible effect on the translational diffusion coefficient. Simulations with direct and HI give similar results to with soft-core and t-HI (within the *error bars*). On the other hand, when only the soft-core interactions are considered, the diffusion coefficients are overestimated. This suggests a minor role for direct interactions and HI in determining the translational diffusion coefficient. The values obtained from BD simulations, which include the direct and HI as well as the experimental values, deviate from the analytical model for concentrations above 0.15 volume fraction. When all but the soft-core terms are switched off, the diffusion coefficients are close to the analytical model curve, implying that the diffusion of BSA resembles that of a soft sphere.

More pronounced effects leading to similar conclusions are observed for IgG. In this case, a strong deviation from the analytical model is observed for experimental and computed diffusion coefficients, especially for concentrations above  $0.1 \phi$ . As can be seen in Fig. 2 B, very similar  $D^f$  values are obtained from the simulations with the soft-core only or including direct interactions and HI, which implies that the shape is the main factor responsible for the strong reduction of the translational diffusion coefficient. The HI tends to slightly lower the translational diffusion coefficients.

A significant improvement in the quality of fit of the experimental data by considering subdiffusion could not be observed for either of the proteins and would be small relative to the large systematic error (Fig. 1). Small deviations from normal diffusion measured by FCS could be explained by optical artifacts (28,58). To check for the possibility of subdiffusion, we computed the anomalous exponent,  $\alpha$ , from the BD simulations.

### Transient anomalous diffusion

The computed time-dependent diffusional properties were analyzed by examining plots of  $\log(msd/\tau)$  versus  $\log(\tau)$ . By fitting these curves at given closed intervals, the anomalous exponent,  $\alpha$ , was derived for different time regimes. Moreover, the crossover time, i.e., the time associated with a change from anomalous to normal diffusion (59), was obtained. A slope = 0, which corresponds to  $\alpha = 1$ , reflects a normal diffusion process whereas a slope  $< 0$  is associated with anomalous subdiffusive behavior. Sig-

nificant deviation from normal diffusion appears for concentrations  $> 200$  g/L (see Fig. 3 and Fig. S1 in the Supporting Material). For BSA, an appreciable deviation can be detected in the simulations at 300 g/L, whereas for IgG transient subdiffusive behavior was observed at 200 g/L as well.

Two diffusional regimes can be distinguished: an anomalous regime on the submicrosecond timescale and a normal diffusion regime on longer timescales. The crossover time ( $\tau_c$ ) varies depending on the concentration and it is in general longer for IgG compared to BSA, as indicated in Fig. 3. By comparing the simulations with direct interactions plus HI with the soft-core term only, we observe that the transient anomalous diffusion occurs in both cases (compare panels B and D with panels A and C in Fig. 3). Hence, we suggest that, for these systems, the subdiffusion is mainly determined by the steric effects of the crowder molecules. Moreover, we can observe that the presence of direct interactions increases the  $\alpha$ -exponent resulting in less anomalous behavior. To explain this behavior, we should consider the formation of transient oligomers. When direct interactions are present, oligomers form in the solution in a concentration-dependent manner (see Transient Cluster Formation). Each monomer moves in a polydisperse medium where the oligomers can dynamically vary their size and the monomer itself can be transiently part of the oligomers. This implies that at short timescales on the order of the lifetime of the oligomers, diffusion is more strongly affected by increasing the concentration compared to simulations without direct

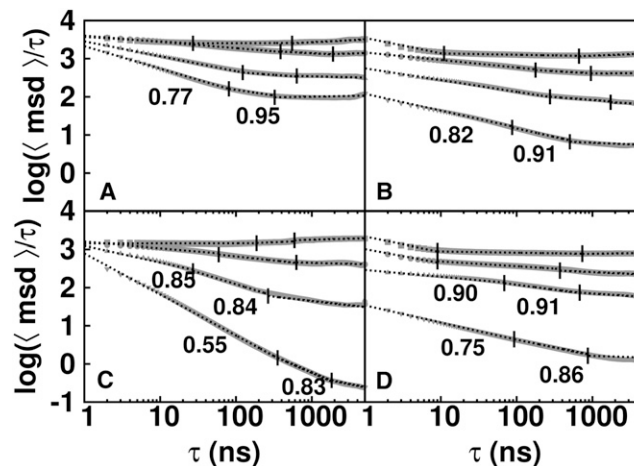

FIGURE 3 Computation of the anomalous diffusion exponent,  $\alpha$ . Values computed from the BD simulations of  $\log(msd/\tau)$  are plotted against  $\tau$  on a logarithmic scale for solutions at different concentrations. Concentration decreases from bottom to top (300, 203, 116, and 10 g/L for BSA and 300, 200, 100, and 10 g/L for IgG). The results for BD simulations with the soft-core interaction term only (A and C) and with the full interaction terms (B and D) are shown. Results of simulations of BSA are shown in panels A and B whereas those of IgG are shown in panels C and D. The  $\alpha$ -exponent and the boundaries of the fitting intervals are shown on the plot.

interactions where no oligomers are formed. Indeed, comparison of panels *B* and *D* with panels *A* and *C* in Fig. 3 shows that the values of  $\log(msd/\tau)$  at short timescales are lower when direct interactions are computed. The formation of oligomers then leads to a faster convergence of the diffusion coefficient to its long-time value, explaining the less anomalous behavior in simulations with direct interactions.

### Rotational diffusion coefficient

The simulations show that the short-time rotational diffusion coefficients of both BSA and IgG decrease markedly as protein concentration increases (see Fig. 4). For BSA, direct interactions have an important effect on the rotational diffusion coefficient. At the highest concentration, 300 g/L, the computed rotational diffusion coefficient is threefold lower in simulations with direct interactions compared to the simulations without direct interactions. Hydrodynamic interactions, when applied to the translational diffusion only, have an almost negligible effect on the rotational diffusion. However, the inclusion of rotational hydrodynamic interactions shows a modest effect, further reducing the rotational diffusion coefficient. For IgG, the concentration-dependent decrease in the rotational diffusion coefficient is even stronger than for BSA. But unlike BSA, the strong decrease in the rotational diffusion coefficient is almost completely due to the steric effects of the protein crowders. Indeed, simulations performed with the soft-core term only, show values of the rotational diffusion coefficients similar to those obtained including the direct plus rotational and translational HI. As for BSA, translational hydrodynamic interactions have a negligible effect. Very

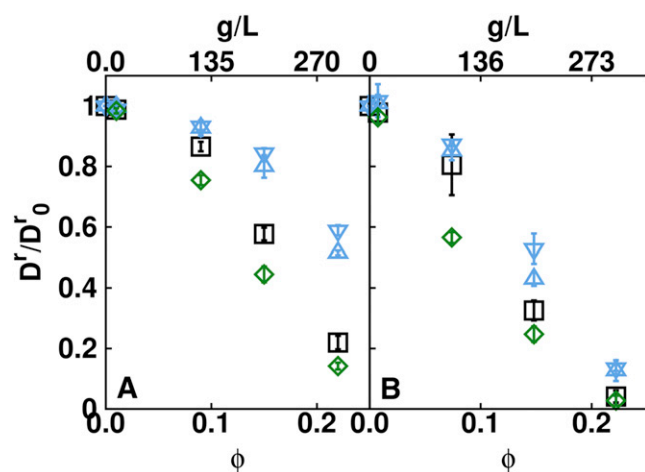

FIGURE 4 Normalized rotational diffusion coefficients of BSA (*A*) and IgG (*B*) estimated from the correlation function of protein orientations obtained in the BD simulations. The simulations were performed with direct interactions plus r-HI and t-HI (green diamonds), direct interactions with t-HI (black squares), soft-core plus t-HI (blue down-triangles), and soft-cores only (blue up-triangles).

similar behavior is observed for the long-time rotational diffusion coefficient  $D^{long}$  (see Fig. S2), implying that correlations are not seen beyond a few hundred nanoseconds.

### Transient cluster formation

To further investigate the role of direct interactions (electrostatics and nonpolar desolvation) in determining the dynamics of the proteins in solution, we checked for the presence and formation of protein oligomers during the simulations. We restrict our discussion here to the analysis of oligomer formation in the IgG solutions; analogous conclusions can be drawn for BSA (see Fig. S3). As shown in Fig. 5 *A*, oligomer formation is observed to be concentration-dependent. The increase in the osmotic pressure, due to the increase in the concentration, allows the small electrostatic repulsion between the proteins to be overcome, resulting in short-range attractive interactions. From an analysis of oligomer formation in the simulations with only the soft-core repulsion term, using the same contact parameters as applied to the analysis of the simulations with direct interaction terms, we found that the simulations with the soft-core term only result in 99% of the proteins being in

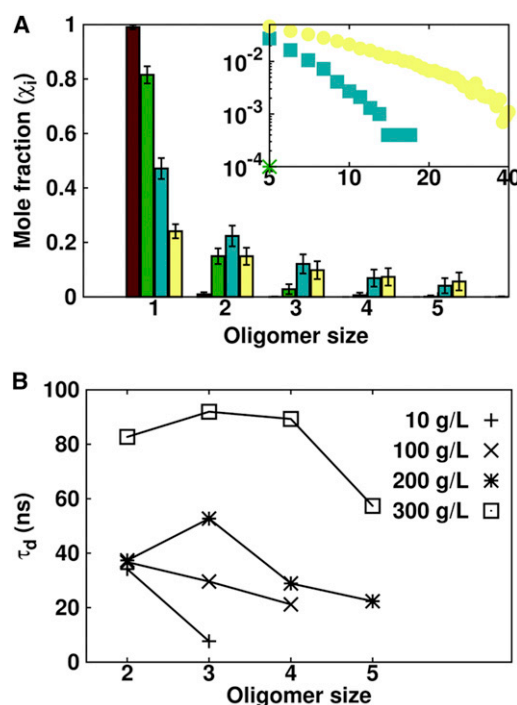

FIGURE 5 Transient oligomer formation in BD simulations of IgG solutions. (*A*) Average mole fractions of IgG oligomers up to pentamers observed in simulations at 10 g/L (dark red), 100 g/L (green), 200 g/L (blue), and 300 g/L (pale yellow) concentrations. Mole fractions of oligomers larger than or equal to pentamers are shown (*inset*) on a log-log scale (only present for concentrations  $\geq$  to 200 g/L). (*B*) Oligomer dissociation times for IgG at different volume fractions. If a value is not plotted, e.g., the tetramers or pentamers at the lowest concentrations, it means that they form in too low a concentration to give reliable dissociation times.

the monomer state at all concentrations. This observation indicates that the oligomers found in the simulations with direct interactions depend on the formation of true contacts (see Fig. S4). It should be noted that the oligomers formed in the simulations are diffusional encounter complexes. The absence of the treatment of internal flexibility and hydrogen bonds hinders the formation of fully bound oligomers. To characterize the oligomers found in the simulations, we computed their lifetimes (see Fig. 5 B). If the lifetime of an oligomer is much shorter than the time that it needs to diffuse one protein diameter,  $\tau_0^D$ , the oligomer can be defined as transient and the dynamics will be essentially determined by the monomers (60). The diffusional relaxation time,  $\tau_0^D$ , can be estimated as  $\tau_0^D = a^2/D_0'$ , where  $a$  is the hydrodynamic radius of a monomer and  $D_0'$  is its diffusion coefficient. For IgG, we assumed a hydrodynamic radius of 55.29 Å (estimated using HYDROPRO (53)), which gives a  $\tau_0^D$  of 760 ns. The lifetimes of the oligomeric species shown in Fig. 5 B are at least one order of magnitude smaller than the diffusional time  $\tau_0^D$ , indicating that oligomer formation is in the transient regime. Due to the rapid dissociation of the oligomers, the long-time dynamics are only slightly affected by oligomerization, as shown by the small reduction of the long-time diffusion coefficients that occurs when direct interactions are switched on (see Fig. 2).

## CONCLUDING DISCUSSION

The measured and computed translational diffusion coefficients for systems with BSA and IgG as crowding solutions show good agreement. The simulations show that the strong concentration dependence of the translational diffusion coefficient observed experimentally for BSA and IgG solutions is mainly determined by the steric effect of the crowder proteins, which depends on both the excluded volume and the shape of the crowders. Indeed, the experimental translational diffusion coefficients can be quantitatively reproduced by means of BD simulations that only include the soft-core interaction term between the molecules. The concentration dependence of the translational diffusion coefficient of IgG could not be reproduced by an analytical model in which the protein is assumed to be spherical, underlining the important contribution of shape to translational diffusion. Given the good correspondence of the translational diffusion coefficients determined experimentally and computed from BD simulations, simulation data were analyzed to examine how the rotational diffusion coefficient and the transient oligomer formation depend on the properties of the crowder solution. We were not able to obtain rotational diffusion coefficients from time-resolved anisotropy measurements in the appropriate crowder concentration range for the proteins investigated here, possibly because different rotamer conformations of the Atto633 label lead to multiple lifetimes or because oligomer

formation affects the lifetime of the fluorescence of the label.

The computed rotational diffusion coefficients also display a strong dependence on crowder concentration. However, whereas the rotational diffusion coefficient decreases strongly with increasing IgG crowder concentration because of the Y-shape of the molecule, for the more spherical BSA, the rotational diffusion coefficient is determined by both steric effects (excluded volume) and direct interactions. Moreover, for the systems studied, our results show that hydrodynamic interactions have a relatively minor role in determining diffusion properties. Oligomerization was dependent on the presence of direct interactions between the proteins. The extent of oligomerization was concentration-dependent but, at all concentrations studied, it was transient and therefore had little impact on the long-time translational diffusion. We conclude that the excluded volume and shape of crowder macromolecules are key determinants of the diffusional motion of (tracer) proteins.

## SUPPORTING MATERIAL

Seven sections, four figures, and references (61–66) are available at [http://www.biophysj.org/biophysj/supplemental/S0006-3495\(13\)00259-2](http://www.biophysj.org/biophysj/supplemental/S0006-3495(13)00259-2).

This work was supported by the Klaus Tschira Foundation and the Center for Modelling and Simulation in the Biosciences in Heidelberg, and a grant for supercomputing time at the Environmental Molecular Science Laboratory (grant No. 30994). We also thank the Deutsche Forschungsgemeinschaft for financial support (DFG grants No. GRK 1114 and No. EXC 81).

We acknowledge M. Martinez (Heidelberg Institute for Theoretical Studies, Heidelberg), M. Weiss, and M. Hellmann (Center for Modelling and Simulation in the Biosciences, Heidelberg) for many valuable discussions. We are grateful to S.T. Schwaebel for assistance in the FCS data acquisition used in this article.

## REFERENCES

- Morelli, M. J., R. J. Allen, and P. R. T. Wolde. 2011. Effects of macromolecular crowding on genetic networks. *Biophys. J.* 101: 2882–2891.
- Elcock, A. H. 2010. Models of macromolecular crowding effects and the need for quantitative comparisons with experiment. *Curr. Opin. Struct. Biol.* 20:196–206.
- Wang, Y., C. Li, and G. J. Pielak. 2010. Effects of proteins on protein diffusion. *J. Am. Chem. Soc.* 132:9392–9397.
- Zhou, H.-X., G. Rivas, and A. P. Minton. 2008. Macromolecular crowding and confinement: biochemical, biophysical, and potential physiological consequences. *Annu. Rev. Biophys.* 37:375–397.
- Phillip, Y., E. Sherman, ..., G. Schreiber. 2009. Common crowding agents have only a small effect on protein-protein interactions. *Biophys. J.* 97:875–885.
- Dix, J. A., and A. S. Verkman. 2008. Crowding effects on diffusion in solutions and cells. *Annu. Rev. Biophys.* 37:247–263.
- Luby-Phelps, K. 2000. Cytoarchitecture and physical properties of cytoplasm: volume, viscosity, diffusion, intracellular surface area. *Int. Rev. Cytol.* 192:189–221.
- Ellis, R. J. 2001. Macromolecular crowding: obvious but underappreciated. *Trends Biochem. Sci.* 26:597–604.

9. Geyer, T. 2012. Mixing normal and anomalous diffusion. *J. Chem. Phys.* 137:115101.
10. Guigas, G., and M. Weiss. 2008. Sampling the cell with anomalous diffusion—the discovery of slowness. *Biophys. J.* 94:90–94.
11. Ellis, R. J., and A. P. Minton. 2003. Cell biology: join the crowd. *Nature.* 425:27–28.
12. Zorrilla, S., and M. P. Lillo. 2009. Quantitative investigation of biomolecular interactions in crowded media by fluorescence spectroscopy, a good choice. *Curr. Protein Pept. Sci.* 10:376–387.
13. Zimmerman, S. B., and A. P. Minton. 1993. Macromolecular crowding: biochemical, biophysical, and physiological consequences. *Annu. Rev. Biophys. Biomol. Struct.* 22:27–65.
14. Wardell, M., Z. Wang, ..., D. C. Carter. 2002. The atomic structure of human methemalbumin at 1.9 Å. *Biochem. Biophys. Res. Commun.* 291:813–819.
15. Elson, E. L. L. 2011. Fluorescence correlation spectroscopy: past, present, future. *Biophys. J.* 101:2855–2870.
16. Medina, M. A., and P. Schuille. 2002. Fluorescence correlation spectroscopy for the detection and study of single molecules in biology. *Bioessays.* 24:758–764.
17. Rigler, R., and P. Kask. 1993. Fluorescence correlation spectroscopy with high count rate and low background: analysis of translational diffusion. *Chem. Phys.* 22:169–175.
18. Jameson, D. M., J. A. Ross, and J. P. Albanesi. 2009. Fluorescence fluctuation spectroscopy: ushering in a new age of enlightenment for cellular dynamics. *Biophys. Rev.* 1:105–118.
19. Zustiak, S. P., R. Nossal, and D. L. Sackett. 2011. Hindered diffusion in polymeric solutions studied by fluorescence correlation spectroscopy. *Biophys. J.* 101:255–264.
20. Braeckmans, K., H. Deschout, and J. Demeester. 2011. Measuring molecular dynamics by FRAP, FCS, and SPT. In *Optical Fluorescence Microscopy*. A. Diaspro, editor. Springer, Berlin. 153–163.
21. Krichevsky, O., and G. Bonnet. 2002. Fluorescence correlation spectroscopy: the technique and its applications. *Rep. Prog. Phys.* 65:251–297.
22. Magde, D., E. L. Elson, and W. W. Webb. 1974. Fluorescence correlation spectroscopy. II. An experimental realization. *Biopolymers.* 13: 29–61.
23. Kim, S. A., K. G. Heinze, and P. Schuille. 2007. Fluorescence correlation spectroscopy in living cells. *Nat. Methods.* 4:963–973.
24. Haustein, E., and P. Schuille. 2003. Ultrasensitive investigations of biological systems by fluorescence correlation spectroscopy. *Methods.* 29:153–166.
25. Wawrezynieck, L., P.-F. Lenne, ..., H. Rigneault. 2004. Fluorescence correlation spectroscopy to determine diffusion laws: application to live cell membranes. *Proc. SPIE, Biophotonics Micro- and Nano-Imaging.* 5462:92–102.
26. Dauty, E., and A. S. Verkman. 2004. Molecular crowding reduces to a similar extent the diffusion of small solutes and macromolecules: measurement by fluorescence correlation spectroscopy. *J. Mol. Recognit.* 17:441–447.
27. Ushida, K., M. Tokuyama, ..., H. Nishiyama. 2008. Anomalous diffusion in polymer solution as probed by fluorescence correlation spectroscopy and its universal importance in biological systems. *AIP Conf. Proc.* 982:464–469.
28. Malchus, N., and M. Weiss. 2010. Elucidating anomalous protein diffusion in living cells with fluorescence correlation spectroscopy—facts and pitfalls. *J. Fluoresc.* 20:19–26.
29. Weiss, M., M. Elsner, ..., T. Nilsson. 2004. Anomalous subdiffusion is a measure for cytoplasmic crowding in living cells. *Biophys. J.* 87:3518–3524.
30. McGuffee, S. R., and A. H. Elcock. 2006. Atomically detailed simulations of concentrated protein solutions: the effects of salt, pH, point mutations, and protein concentration in simulations of 1000-molecule systems. *J. Am. Chem. Soc.* 128:12098–12110.
31. Mereghetti, P., R. R. Gabdouliline, and R. C. Wade. 2010. Brownian dynamics simulation of protein solutions: structural and dynamical properties. *Biophys. J.* 99:3782–3791.
32. Mereghetti, P., and R. C. Wade. 2012. Atomic detail Brownian dynamics simulations of concentrated protein solutions with a mean field treatment of hydrodynamic interactions. *J. Phys. Chem. B.* 116: 8523–8533.
33. Ermak, D. L., and J. A. McCammon. 1978. Brownian dynamics with hydrodynamic interactions. *J. Chem. Phys.* 69:1352–1360.
34. Magde, D., E. Elson, and W. W. Webb. 1972. Thermodynamic fluctuations in a reacting system - measurement by fluorescence correlation spectroscopy. *Phys. Rev. Lett.* 29:705–708.
35. Widengren, J., R. Rigler, and U. Mets. 1994. Triplet-state monitoring by fluorescence correlation spectroscopy 1. *J. Fluoresc.* 4:255–258.
36. Dertinger, T., V. Pacheco, ..., J. Enderlein. 2007. Two-focus fluorescence correlation spectroscopy: a new tool for accurate and absolute diffusion measurements. *ChemPhysChem.* 8:433–443.
37. Gabdouliline, R. R., and R. C. Wade. 1997. Simulation of the diffusional association of barnase and barstar. *Biophys. J.* 72:1917–1929.
38. Gabdouliline, R. R., and R. C. Wade. 2009. On the contributions of diffusion and thermal activation to electron transfer between *Phormidium laminosum* plastocyanin and cytochrome *f*: Brownian dynamics simulations with explicit modeling of nonpolar desolvation interactions and electron transfer events. *J. Am. Chem. Soc.* 131:9230–9238.
39. Gabdouliline, R. R., and R. C. Wade. 1996. Effective charges for macromolecules in solvent. *J. Phys. Chem.* 100:3868–3878.
40. Heyes, D. 1997. Mean-field hydrodynamics Brownian dynamics simulations of stabilized colloidal liquids under shear. *J. Non-Newt. Fluid Mech.* 68:101–124.
41. Urbina-Villalba, G., M. García-Sucre, and J. Toro-Mendoza. 2003. Average hydrodynamic correction for the Brownian dynamics calculation of flocculation rates in concentrated dispersions. *Phys. Rev. E Stat. Nonlin. Soft Matter Phys.* 68:061408.
42. Sun, J., and H. Weinstein. 2007. Toward realistic modeling of dynamic processes in cell signaling: quantification of macromolecular crowding effects. *J. Chem. Phys.* 127:155105.
43. Tokuyama, M., and I. Oppenheim. 1994. Dynamics of hard-sphere suspensions. *Phys. Rev. E Stat. Phys. Plasmas Fluids Relat. Interdiscip. Topics.* 50:R16–R19.
44. Cichocki, B., M. Ekiel-Jezewska, and E. Wajnryb. 1999. Lubrication corrections for three-particle contribution to short-time self-diffusion coefficients in colloidal dispersions. *J. Chem. Phys.* 111:3265–3273.
45. Pieper, U., N. Eswar, ..., A. Sali. 2011. MODBASE, a database of annotated comparative protein structure models and associated resources. *Nucleic Acids Res.* 37:D347–D354.
46. Laskowski, R. A., M. W. MacArthur, ..., J. M. Thornton. 1993. PROCHECK: a program to check the stereochemical quality of protein structures. *J. Appl. Cryst.* 26:283–291.
47. Wallner, B., and A. Elofsson. 2003. Can correct protein models be identified? *Protein Sci.* 12:1073–1086.
48. Mereghetti, P., M. L. Ganadu, ..., L. De Gioia. 2008. Validation of protein models by a neural network approach. *BMC Bioinformatics.* 9:66.
49. Harris, L. J., S. B. Larson, ..., A. McPherson. 1997. Refined structure of an intact IgG2a monoclonal antibody. *Biochemistry.* 36:1581–1597.
50. Gordon, J. C., J. B. Myers, ..., A. Onufriev. 2005. H<sup>++</sup>: a server for estimating pK<sub>a</sub>s and adding missing hydrogens to macromolecules. *Nucleic Acids Res.* 33(Web Server issue):W368–W371.
51. Jorgensen, W. L., and J. Tirado-Rives. 1988. The OPLS (optimized potentials for liquid simulations) potential functions for proteins, energy minimizations for crystals of cyclic peptides and crambin. *J. Am. Chem. Soc.* 110:1657–1666.
52. Madura, J. D., J. M. Briggs, ..., J. A. McCammon. 1995. Electrostatics and diffusion of molecules in solution: simulations with the University of Houston Brownian dynamics program. *Comput. Phys. Commun.* 91:57–95.



53. García De La Torre, J., M. L. Huertas, and B. Carrasco. 2000. Calculation of hydrodynamic properties of globular proteins from their atomic-level structure. *Biophys. J.* 78:719–730.
54. Mazza, M. G., N. Giovambattista, ..., F. W. Starr. 2007. Connection of translational and rotational dynamical heterogeneities with the breakdown of the Stokes-Einstein and Stokes-Einstein-Debye relations in water. *Phys. Rev. E Stat. Nonlin. Soft Matter Phys.* 76:031203.
55. von der Hocht, I., and J. Enderlein. 2007. Fluorescence correlation spectroscopy in cells: confinement and excluded volume effects. *Exp. Mol. Pathol.* 82:142–146.
56. Tokuyama, M., T. Moriki, and Y. Kimura. 2011. Self-diffusion of biomolecules in solution. *Phys. Rev. E Stat. Nonlin. Soft Matter Phys.* 83:051402.
57. Nesmelova, I. V., V. D. Skirda, and V. D. Fedotov. 2002. Generalized concentration dependence of globular protein self-diffusion coefficients in aqueous solutions. *Biopolymers.* 63:132–140.
58. Hess, S. T., S. Huang, ..., W. W. Webb. 2002. Biological and chemical applications of fluorescence correlation spectroscopy: a review. *Biochemistry.* 41:697–705.
59. Vilaseca, E., A. Isvoran, ..., F. Mas. 2011. New insights into diffusion in 3D crowded media by Monte Carlo simulations: effect of size, mobility and spatial distribution of obstacles. *Phys. Chem. Chem. Phys.* 13:7396–7407.
60. Liu, Y., L. Porcar, ..., P. Baglioni. 2011. Lysozyme protein solution with an intermediate range order structure. *J. Phys. Chem. B.* 115: 7238–7247.
61. Zhang, Y., and J. Skolnick. 2004. Scoring function for automated assessment of protein structure template quality. *Proteins.* 57:702–710.
62. Levitt, M., and M. Gerstein. 1998. A unified statistical framework for sequence comparison and structure comparison. *Proc. Natl. Acad. Sci. USA.* 95:5913–5920.
63. Majorek, K. A., P. J. Porebski, ..., W. Minor. 2012. Structural and immunologic characterization of bovine, horse, and rabbit serum albumins. *Mol. Immunol.* 52:174–182.
64. Bujacz, A. 2012. Structures of bovine, equine and leporine serum albumin. *Acta Crystallogr. D Biol. Crystallogr.* 68:1278–1289.
65. Gabdoulline, R. R., and R. C. Wade. 1998. Brownian dynamics simulation of protein-protein diffusional encounter. *Methods.* 14: 329–341.
66. Pace, C. N., F. Vajdos, ..., T. Gray. 1995. How to measure and predict the molar absorption coefficient of a protein. *Protein Sci.* 4:2411–2423.

# Supporting Material:

## The shape of protein crowders is a major determinant of protein diffusion

Jessica Balbo§

CellNetworks Cluster and Physikalisch-Chemisches Institut,  
Heidelberg University, Heidelberg, Germany

Paolo Mereghetti§

Molecular and Cellular Modeling Group,  
Heidelberg Institute for Theoretical Studies, Heidelberg, Germany,  
Center for Nanotechnology Innovation, Italian Institute of Technology, Piazza San Silvestro, 12 I-56127 Pisa, Italy  
and  
Center for Modelling and Simulation in the Bioscience,  
Heidelberg University, Heidelberg, Germany

Dirk-Peter Herten

CellNetworks Cluster and Physikalisch-Chemisches Institut,  
Heidelberg University, Heidelberg, Germany

Rebecca C. Wade\*

Molecular and Cellular Modeling Group,  
Heidelberg Institute for Theoretical Studies, Heidelberg, Germany  
and  
Zentrum für Molekulare Biologie der Universität Heidelberg,  
Heidelberg University, Heidelberg, Germany

§ Jessica Balbo and Paolo Mereghetti contributed equally to this work.

\*Corresponding author. Address: Heidelberg Institute for Theoretical Studies HITS gGmbH, Heidelberg University, Schloss-Wolfsbrunnenweg 35, 69118 Heidelberg, Germany., Tel.: +49 6221 533 247, Fax: +49 6221 533 298, Email:rebecca.wade@h-its.org

# 1. Assessment of the quality of the structural model of BSA obtained from Modbase [45].

## 1.1 Results from AIDE [48]

| Predicted RMSD(Å) | Predicted TM-score | Predicted LG-score | Overall Quality |
|-------------------|--------------------|--------------------|-----------------|
| 3.97              | 0.92               | 1.08               | EXCELLENT*      |

\* According to the AIDE method, a global nominal evaluation is given based on a combination of the RMSD, TM-score and LG-score values. For more details see ref. [48]

## 1.2 Results from ProQ [47]

Predicted LG-score : 4.578

Predicted MaxSub : 0.473

### Description of the measures of model accuracy:

RMSD (Root mean square deviation). The method used here refers to the predicted RMSD of the backbone atoms. RMSD is positively defined within the range [0,N]. The closer the predicted RMSD is to 0 the better is the model.

TM-score was developed to evaluate the topology similarity of two protein structures [61]. TM-score values fall into the interval [0, 1]. Scores equal to or below 0.17 indicate that the prediction has better reliability than a random selection from the PDB.

LG-score detects segments in common between the model and correct target structure by means of dynamic programming. Based on these segments, is computed a structural comparison score,  $S_{str}$  [62], defined by

$$S_{str} = \frac{1}{1 + (d_{ij} / d_0)^2}$$

where  $d_{ij}$  is the distance between an atom  $i$  in the native structure and an atom  $j$  in the model, usually  $C_{\alpha}$  carbons are used.  $d_0$  is a threshold set to 0.5 Å. The LG-score is the log of the probability of finding a match with the same length and equal or better  $S_{str}$ .

LG-score < 0: bad model, 1 < LG-score < 4 : good model, LG-score > 4 : extremely good model.

MaxSub uses an heuristic algorithm to calculate the largest number of residues that minimize the root

mean square deviation between the model and the reference structure. The score is then normalized such that it ranges between 0 and 1. A MaxSub value of 1 corresponds to perfect superposition.

### 1.3 Results from PROCHECK [46]

```

+-----<<< P R O C H E C K      S U M M A R Y >>>-----+
| BSA.pdb      2.0                                          581 residues |
| * Ramachandran plot:  95.0% core    4.9% allow    0.0% gener    0.2% disall |
| + All Ramachandrans:  6 labelled residues (out of 579) |
| + Chi1-chi2 plots:   3 labelled residues (out of 393) |
| Main-chain params:  6 better      0 inside      0 worse |
| Side-chain params:  5 better      0 inside      0 worse |
| * Residue properties: Max.deviation:    8.2          Bad contacts:    5 |
| *                   Bond len/angle:    6.5      Morris et al class:  1  1  2 |
| G-factors          Dihedrals:    0.21  Covalent:   -0.06   Overall:    0.11 |
| M/c bond lengths:  99.2% within limits  0.8% highlighted |
| M/c bond angles:   95.3% within limits  4.7% highlighted |
| Planar groups:     100.0% within limits  0.0% highlighted |
+-----+

```

+ May be worth investigating further. \* Worth investigating further.

### 1.4 BSA crystal structure

Recently, after we started this work using the model of BSA from Modbase, two crystal structures of BSA were released : 3V03 [63] and 4F5S [64].

The superposition of the BSA model used with the two crystal structures gives an RMSD on the C-alpha atoms of 2.9 Å (for 4F5S) and 3.0 Å (for 3V03).

Taking into account the intersubdomain flexibility of serum albumin proteins [64], and the size of the BSA (583 residues), we consider such values of RMSD to provide confirmation of the quality of the BSA model used.

## 2. Computation of the translational diffusion coefficient from the mean square displacement

$$D^t = \frac{\langle msd^t(\tau) \rangle_{te}}{6\Delta t} = \frac{\langle msd^t(\tau_2) \rangle_{te} - \langle msd^t(\tau_1) \rangle_{te}}{6(\tau_2 - \tau_1)}$$

where  $\langle msd^t(\tau) \rangle_{te}$  is the time-ensemble averaged mean square displacement (see Method in the main text for details).

Five different  $D^t$  values were obtained for five consecutive non-overlapping intervals of equal length ( $t^{end}/5$ ) (corresponding to  $1\mu s$  in our simulations), which span all the post-equilibration simulation time. Since a linear behaviour was detected for  $\tau > 1\mu s$ , an average value and a standard deviation were computed by averaging the diffusion coefficients obtained in the last 4 intervals, i.e.  $\tau = 2 - 5\mu s$ .

## 3. Analytical models for the concentration dependence of translational self-diffusion coefficients

Two analytical models for the short-time as well as for the long time translational diffusion coefficient which includes HI as well as direct interactions, were derived by Tokuyama et al. [56]. According to this model, the long time translational diffusion coefficient is derived from the short-time translational diffusion coefficient as

$$\frac{D^t(\varphi)}{D_0^t} = \frac{D_{short}^t(\varphi)}{1 + \kappa D_{short}^t(\varphi) \left( \frac{\varphi}{\varphi_c} \right) \left( 1 - \frac{\varphi}{\varphi_c} \right)^{-2}}$$

where  $\varphi_c = \frac{(4/3)^3}{7\ln(3) - 8\ln(2) + 2}$  and  $\kappa$  was set to 2 according to Ref. [56].

The short-time translational diffusion coefficient, (implemented in the Brownian dynamics simulations) is given by

$$\frac{D_{short}^t(\varphi)}{D_0^t} = \frac{1}{1 + H(\varphi)}$$

where the hydrodynamic function,  $H(\varphi)$  is  $H(\varphi) = \frac{2b^2}{1-b} - \frac{c}{1+2c} - \frac{bc(2+c)}{(1+c)(1-b+c)}$  where  $b = \sqrt{\frac{9}{8}}\varphi$   $c = \frac{11}{16}\varphi$

## 4. Computation of the anomalous exponent for translational

# diffusion

The exponent  $\alpha$  was computed from the slope of the curve  $\log(msd/\tau)$  vs  $\log(\tau)$ . The slope was obtained by a least squares fit of the linear expression  $\log(msd/\tau) = (\alpha - 1)\log(\tau) + \log(6D')$  in a given time interval [59]. The time intervals were selected automatically by iteratively increasing the length of the fitting region, starting from the beginning of the curve, until  $R^2 \leq 0.8$ . Then, the fitting procedure was repeated starting from the end of the previous region. The results are shown in Figure 3. The alpha exponent was also computed directly from the derivative of the  $\log(msd/\tau)$  vs  $\log(\tau)$  curve. The results are shown in Figure 1S. Mean and standard deviation values were obtained by averaging the alpha values within a window of 250 ns.

## 5. Rotational diffusion coefficient

The rotational diffusion coefficient was obtained by first computing the time-ensemble averaged autocorrelation function of the protein orientation vectors  $\mathbf{e}(t)$  and then fitting it with a single exponential of the form  $\langle \mathbf{e}(t)\mathbf{e}(t+\tau) \rangle \propto Ae^{-t/\tau_{rel}}$ .

In all cases, the fitting gave a correlation coefficient greater than 0.9999.

The rotational diffusion coefficient was then obtained from the relaxation time,  $\tau_{rel}$ , as  $D^r = 1/2\tau_{rel}$ .

To obtain an average value and a standard deviation, the post-equilibration trajectory was split into five consecutive time intervals, a  $D^r$  was computed for each interval and then averaged. The value of  $\langle \mathbf{e}(t)\mathbf{e}(t+\tau) \rangle \propto Ae^{-t/\tau_{rel}}$  decays to zero within the first few hundred nanoseconds, so the computed  $D^r$  is considered to be the short-time rotational diffusion coefficient  $D^r_{short}$ .

Alternatively, as described in ref. [54] the ensemble averaged rotational mean squared displacement,  $\langle msd^r(\tau) \rangle$ , was obtained, and an average value and a standard deviation were computed using the same procedure as for the translational diffusion coefficient and the relation  $D^r = \langle msd^r(\tau) \rangle / 4\Delta t$ . As for the translational mean square displacement, in all cases, we observed a linear time dependence of the rotational  $msd$  for  $\tau > 1\mu s$ . The  $D^r$  estimated from the rotational  $msd$  is assumed to be representative of the long-time rotational diffusion  $D^r_{long}$ .

## 6. Computation of transient oligomers in the simulation

The average fractions of oligomeric species (dimer, trimer, etc.) were computed by recording the occurrence of the oligomeric states at each step of the simulation and then averaging over the total number of steps.

An oligomer is defined as a group of two or more proteins which are in contact with each other independently of the oligomer lifetime.

A contact is defined following the "atomic contact criterion" for the definition of encounter complexes described in Ref. [65]. Namely, an encounter complex is formed when at least  $N^{ind}$  independent contacts between two proteins occur. A contact is established when the centers of two atoms (one from

each protein) are closer than a given cutoff,  $d_c$ . The independence of the contacts is ensured by considering only atoms within a protein that are further from each other than a distance,  $d_{min}$

We set  $N^{ind} = 2$ ,  $d_c = 8.5 \text{ \AA}$  and  $d_{min} = 6.0 \text{ \AA}$   $N^{ind} = 2$ . C(alpha) atoms only were considered [32].

The parameters were set to be quite stringent to avoid picking up false contacts only determined by close protein packing in the high volume fraction simulations.

To measure the stability of a given oligomeric species, we monitored all cases where an oligomer was destroyed by the loss or addition of one or more monomeric units. The autocorrelation function of the lifetime of the oligomers was then fitted to a double-exponential function.

The faster component was due to the rapid recrossing of the  $8.5 \text{ \AA}$  cutoff distance used in the contact criterion. The slow component, with period  $\tau_{off}$ , was considered to be representative of a true oligomer dissociation event and could be used to estimate the lifetime of the oligomer.

## 7. Details of FCS experiments

### 7.1 Protein labelling

For protein labelling, 2 mg of each protein was dissolved in 1 ml of 0.01 M PBS (pH 7.4), and fivefold molar excess of Atto633-NHS-ester (ATTO-TEC, Germany; 2 mg/ml) in dimethylformamide was added. The labelled proteins, BSA-633 and IgG-633, were purified and separated from residual dye using mass exclusion chromatography (Sephadex G-25 column).

To obtain the desired pH value of 8.3 for the labeling reaction of  $\gamma$ -globulin, 1M sodium carbonate buffer solution was added. The reaction mixture was kept at room temperature for 1.5h for  $\gamma$ -globulin and 3h for BSA, and then free Atto dye was removed by gravity flow with a NAP<sup>TM</sup>-5 column (GE Healthcare).

The column was preequilibrated with PBS to elute the protein using the same buffer.

The concentrations of the labeled proteins were determined by absorbance using the extinction coefficients at 280 nm, as described elsewhere [66].

### 7.2 Microscope Setup

The FCS-setup was based on an inverted microscope (Axiovert S100 TV, Carl Zeiss Jena GmbH, Germany) with an Olympus objective (60x, 1.2 NA, water immersion; Olympus Tokyo, Japan). Furthermore it consists of a pulsed laser diode (PicoQuant GmbH, Berlin, Germany) for excitation at 640 nm, two avalanche photodiodes (Optoelectronics Perkin-Elmer, Kanada), and a digital correlator (ALV 5000/E, ALV GmbH, Langen, Germany). The sample was excited with 100  $\mu$ W of laser power, and the fluorescence from the detection volume was separated by a dichroic mirror (Dual Line Beam Splitter z 532/635, AHF, Germany) and an emission filter (650-700nm, AHF). The pinhole diameter at the image plane in front of the photodiode was adjusted to 50  $\mu$ m. 30  $\mu$ l of sample was measured on 384-well plates (Greiner Bio-One, Germany) with 175- $\mu$ m-thick glass on the bottom. To prevent

nonspecific adsorption of proteins on the glass surface, the sample chambers were coated with poly(L-lysine) and poly(ethylene glycol), PLL-g-PEG (SuSoS AG, Switzerland). After preparing and drying, the chambered coverglass was immediately used for FCS measurements. In the titration experiment, the duration of the measurements was 60 s, and each point on the titration curve represents the average of ten FCS measurements.



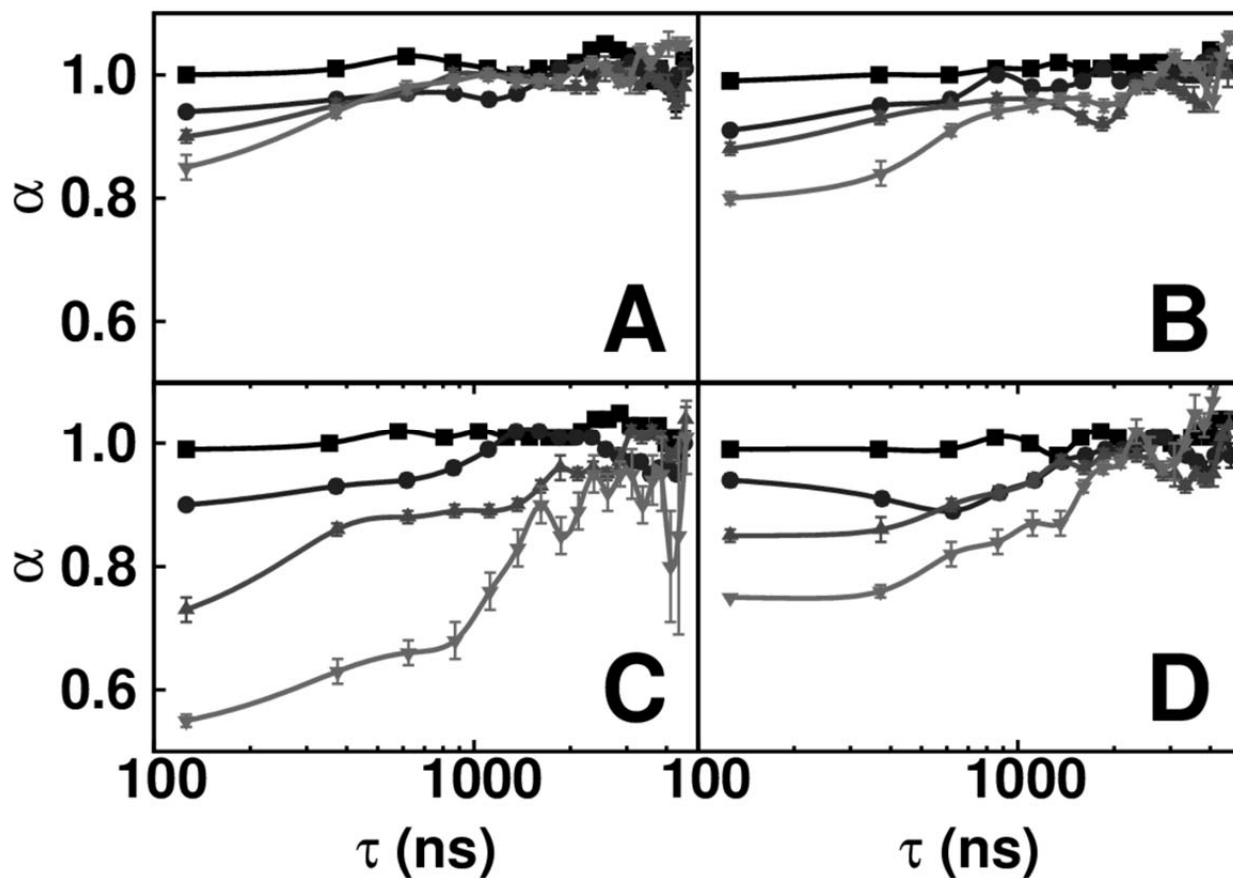

**Figure 1S:** The anomalous exponent, alpha, of the translational diffusion computed directly from the derivative of the  $\log(msd/\tau)$  vs  $\log(\tau)$  curve obtained from BD simulations. Protein concentration increases from top to bottom (300, 203, 116 and 10 g/L for BSA and 300, 200, 100 and 10 g/L for IgG). The results for BD Simulations with the soft-core interaction term only (A and C) and with the full interaction terms (B and D) are shown. Results of simulations of BSA are shown in panels A and B whereas those of IgG are shown in panels C and D.

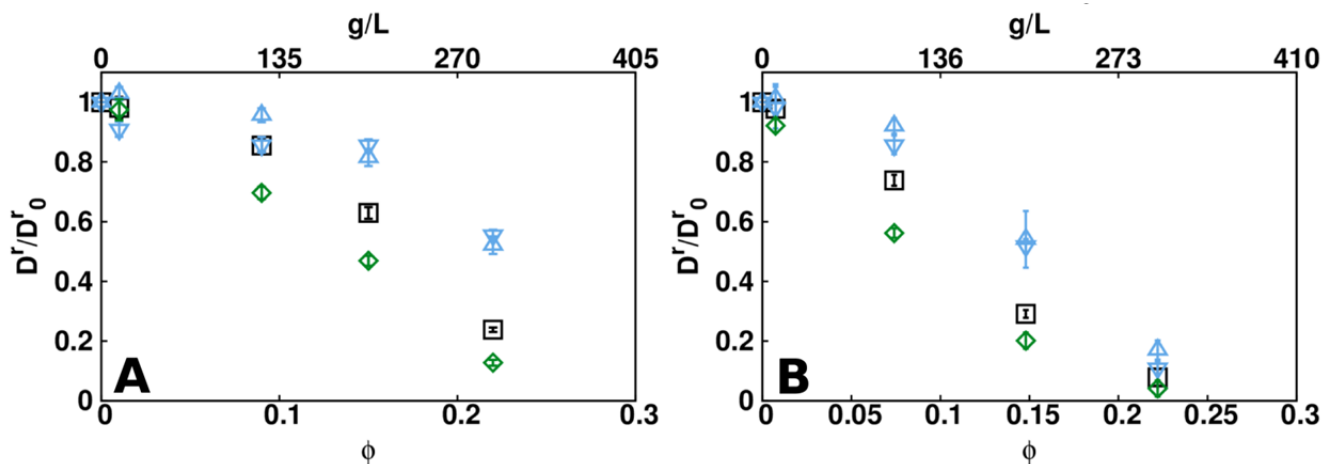

**Figure 2S:** Normalized rotational diffusion coefficients of (A) BSA and (B) IgG computed from the ensemble averaged rotational mean squared displacement in the BD simulations. The results are very similar to those shown in Figure 4 for which the rotational diffusion coefficients were computed from the correlation function of the protein orientations. These results show that the long-time rotational diffusion coefficient is similar to the short-time rotational diffusion coefficient and that correlations are not seen beyond ca. 300 ns.

**A**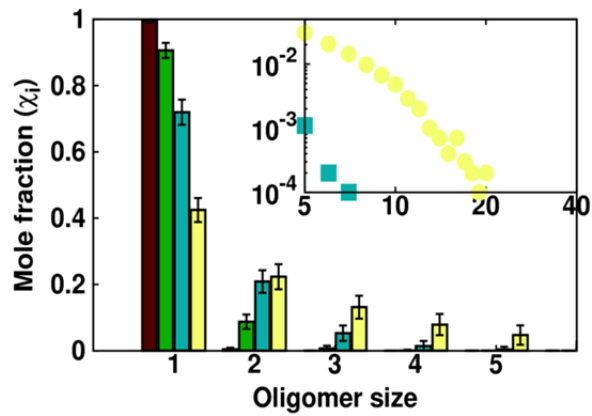**B**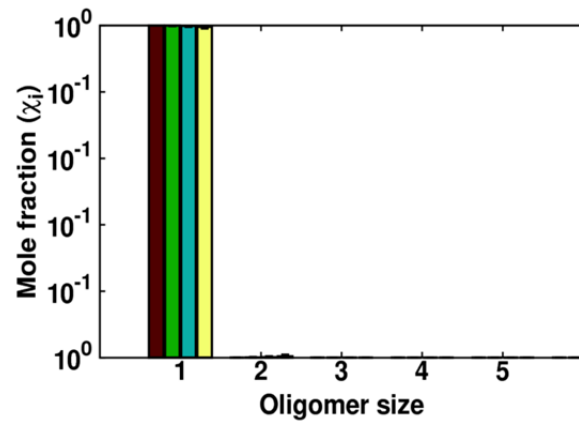**Figure 3S:**

Transient oligomer formation in BD simulations of BSA solutions. Average mole fractions of BSA oligomers are shown at different concentrations: dark red (10 g/L), green (100 g/L), blue (200 g/L), yellow (300 g/L). Simulations were performed with (A) and without (B) direct interactions. In panel A, mole fractions of oligomers larger than or equal to pentamers are shown in the inset on a log-log scale.

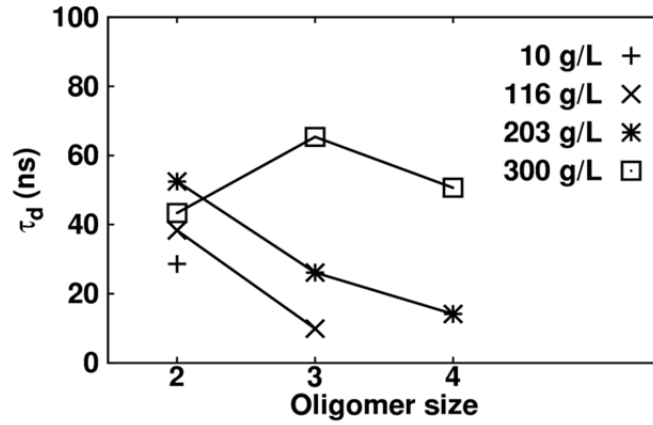

**Figure 4S:** Dissociation times of BSA oligomers at different protein concentrations. If a value is not plotted, e.g. for tetramers at the lowest concentrations, it means that they form in too low a concentration to obtain reliable dissociation times.
